# Supplementary material
Source: PubMed Central journal article supplement (PMC7094134)
Supplement: mmc1.pdf [file mmc1.pdf]

# The Impacts of Simultaneous Disease Intervention Decisions on Epidemic Outcomes - Supplementary Information

Michael A. Andrews<sup>a,\*</sup>, Chris T. Bauch<sup>a,b</sup>

<sup>a</sup>University of Guelph, 50 Stone Rd. E. Guelph, Ontario

<sup>b</sup>University of Waterloo, 200 University Ave. W. Waterloo, Ontario

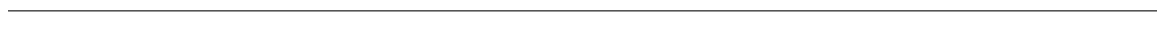

## 1 Asymptomatic Cases

2 Asymptomatic infections can be prevalent in many diseases, and we thus explore the impact of  
3 asymptomatic cases in our model. In these analyses, we use an asymptomatic probability of 50%  
4 for infectious cases, and assume an asymptomatic individual is as infectious as a symptomatic one.  
5 We also recalibrate parameters to maintain epidemic outcomes similar to the baseline scenario while  
6 maintaining the baseline transmission rate of 0.005. In this scenario, we use parameter values of  
7  $\lambda = 2.85$ ,  $\gamma = 0.75$ ,  $\theta = 0.403$ , and the remaining parameters at baseline values. This will allow us  
8 to directly compare the impact of asymptomatic infections.

9 With low transmission rate, vaccination delay does not impact epidemic size when NPIs are  
10 used. (Table 1). When NPIs are not used, epidemic size is minimally affected ( $\approx 2.4\%$  difference  
11 between no vaccine delay and a 60 day vaccine delay.) With baseline transmission rate, the difference  
12 becomes larger (Table 2). With NPIs, final size changes by under 1 percentage point, but without  
13 NPIs, the difference is  $\approx 8.5\%$ . Finally, with a higher transmission rate of  $\beta = 0.006$  (Table 3), NPIs  
14 cause the final size to change  $\approx 2.4\%$  across all vaccine delays, whereas without NPI effects, final  
15 size changes by  $\approx 12\%$ .

16 Thus, we observe similar effects of NPIs on epidemic final size when there are vaccine delays with  
17 asymptomatic cases as we saw without. That is, changes in final size between no delay and longer  
18 delays are much smaller when NPIs are incorporated than when they are not.

19 Considering the effects of differing vaccine efficacy on epidemic outcomes, we see similar results  
20 to the case with no asymptomatic infections. With NPIs used in the population, symptomatic  
21 epidemic size and vaccine uptake do not show a large change across vaccine efficacies ( $\approx 0.3\%$  and  
22  $2\%$ , respectively) compared to when NPIs are not included ( $2.4\%$  difference for final size and  $4.5\%$   
23 difference for vaccine uptake, see Tables 4 and 5).

24 In general, the main qualitative results are similar to when there are asymptomatic infections  
25 to when there are not. When NPIs are included, vaccine availability delays and changes in vaccine  
26 efficacy do not change epidemic final size and vaccine uptake as significantly compared to scenarios  
27 where NPIs are not incorporated.

---

\*Corresponding Author

Email addresses: [mandre04@uoguelph.ca](mailto:mandre04@uoguelph.ca) (Michael A. Andrews), [cbauch@uwaterloo.ca](mailto:cbauch@uwaterloo.ca) (Chris T. Bauch)

Table 1: Epidemic final sizes (symptomatic cases only) with delayed vaccine availability.  $\beta = 0.004$

| Delay | Final Size (with NPIs) $\pm 95\%$ CI | Final Size (without NPIs) $\pm 95\%$ CI |
|-------|--------------------------------------|-----------------------------------------|
| 0     | $0.03839 \pm 0.0025$                 | $0.0932 \pm 0.0013$                     |
| 10    | $0.0381 \pm 0.0026$                  | $0.0924 \pm 0.0014$                     |
| 20    | $0.0395 \pm 0.0024$                  | $0.0933 \pm 0.0012$                     |
| 30    | $0.0397 \pm 0.0024$                  | $0.0940 \pm 0.0023$                     |
| 40    | $0.04086 \pm 0.0025$                 | $0.1010 \pm 0.0019$                     |
| 50    | $0.04105 \pm 0.0023$                 | $0.1108 \pm 0.0024$                     |
| 60    | $0.03953 \pm 0.0025$                 | $0.1173 \pm 0.0029$                     |

Table 2: Epidemic final sizes (symptomatic cases only) with delayed vaccine availability.  $\beta = 0.005$

| Delay | Final Size (with NPIs) $\pm 95\%$ CI | Final Size (without NPIs) $\pm 95\%$ CI |
|-------|--------------------------------------|-----------------------------------------|
| 0     | $0.0816 \pm 0.0016$                  | $0.1107 \pm 0.0006127$                  |
| 10    | $0.0826 \pm 0.0013$                  | $0.1111 \pm 0.0006301$                  |
| 20    | $0.0821 \pm 0.0012$                  | $0.1145 \pm 0.0007419$                  |
| 30    | $0.0817 \pm 0.0013$                  | $0.1313 \pm 0.0022$                     |
| 40    | $0.0838 \pm 0.0014$                  | $0.1648 \pm 0.0031$                     |
| 50    | $0.0847 \pm 0.0018$                  | $0.1855 \pm 0.0031$                     |
| 60    | $0.0864 \pm 0.0015$                  | $0.1958 \pm 0.0023$                     |

Table 3: Epidemic final sizes (symptomatic cases only) with delayed vaccine availability.  $\beta = 0.006$

| Delay | Final Size (with NPIs) $\pm 95\%$ CI | Final Size (without NPIs) $\pm 95\%$ CI |
|-------|--------------------------------------|-----------------------------------------|
| 0     | $0.0987 \pm 0.0006992$               | $0.1236 \pm 0.0006546$                  |
| 10    | $0.0985 \pm 0.0006611$               | $0.1225 \pm 0.0006434$                  |
| 20    | $0.0994 \pm 0.0006425$               | $0.1373 \pm 0.0016$                     |
| 30    | $0.1059 \pm 0.0009648$               | $0.1898 \pm 0.0038$                     |
| 40    | $0.1130 \pm 0.0013$                  | $0.2288 \pm 0.0027$                     |
| 50    | $0.1202 \pm 0.0013$                  | $0.2407 \pm 0.0017$                     |
| 60    | $0.1228 \pm 0.0014$                  | $0.2451 \pm 0.0011$                     |

Table 4: Epidemic final sizes corresponding to vaccine efficacy (symptomatic cases only).

| Efficacy | Final Size (With NPIs) $\pm 95\%$ CI | Final Size (Without NPIs) $\pm 95\%$ CI |
|----------|--------------------------------------|-----------------------------------------|
| 0.5      | $0.0845 \pm 0.0012$                  | $0.1350 \pm 0.0008755$                  |
| 0.6      | $0.0835 \pm 0.0014$                  | $0.1291 \pm 0.0007565$                  |
| 0.7      | $0.0819 \pm 0.0019$                  | $0.1231 \pm 0.0007093$                  |
| 0.8      | $0.0819 \pm 0.0013$                  | $0.1186 \pm 0.0008193$                  |
| 0.9      | $0.0826 \pm 0.0013$                  | $0.1145 \pm 0.0006082$                  |
| 1.0      | $0.0814 \pm 0.0014$                  | $0.1111 \pm 0.0022$                     |

Table 5: Population vaccine uptake corresponding to vaccine efficacy.

| <b>Efficacy</b> | <b>Vaccine Uptake (With NPIs) <math>\pm 95\%</math> CI</b> | <b>Vaccine Uptake (Without NPIs) <math>\pm 95\%</math> CI</b> |
|-----------------|------------------------------------------------------------|---------------------------------------------------------------|
| 0.5             | $0.4662 \pm 0.018$                                         | $0.7124 \pm 0.0037$                                           |
| 0.6             | $0.4604 \pm 0.0201$                                        | $0.7051 \pm 0.0036$                                           |
| 0.7             | $0.4449 \pm 0.0223$                                        | $0.6938 \pm 0.0037$                                           |
| 0.8             | $0.4408 \pm 0.019$                                         | $0.6850 \pm 0.0053$                                           |
| 0.9             | $0.4503 \pm 0.019$                                         | $0.6784 \pm 0.0036$                                           |
| 1.0             | $0.4478 \pm 0.02$                                          | $0.6676 \pm 0.013$                                            |

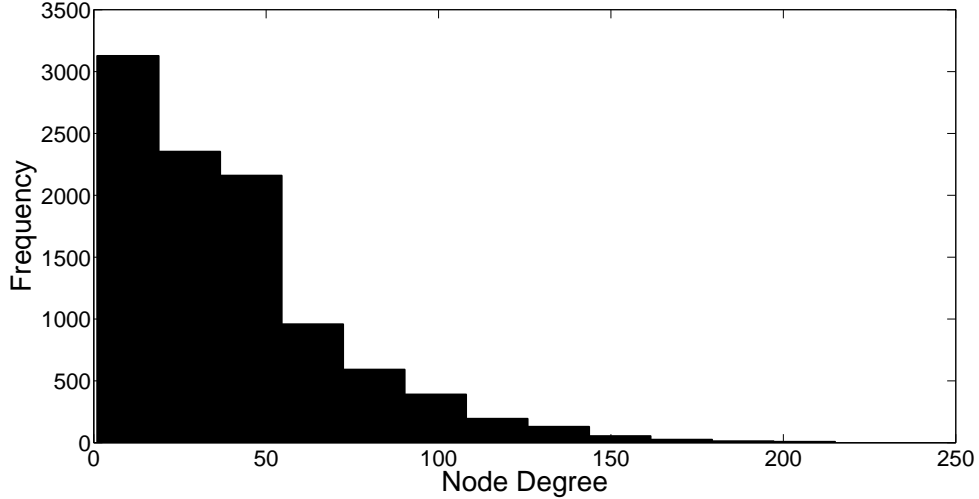

Figure 1: Frequency of node degrees in the empirically based network. The majority of nodes have a degree  $< 75$ , whereas fewer nodes have higher degrees. The average node degree is 38.645.

29 Different network types will have an impact on epidemic outcomes due to contact structures  
 30 playing a pivotal role in disease transmission. In our model, we initially used an empirically based  
 31 network. Here, we will look at results stemming from a random network and a power law network.  
 32 For these two types of networks, we recalibrate the parameters to achieve similar baseline scenarios  
 33 to the outcomes corresponding to the empirical network.

34 For the random networks, we use the same average node degree seen in the empirically based  
 35 network (Figure 1), and we generate new networks each simulation. The parameters used to obtain  
 36 the same epidemic outcomes as the original baseline scenario are  $\lambda = 1.75$ ,  $\gamma = 0.25$ ,  $\theta = 0.28$ ,  
 37  $\beta = 0.00585$ , and the remaining parameters at baseline values. We note that the transmission rate  
 38 must be higher with this network structure to achieve the same epidemic final size, and in turn the  
 39 same vaccine uptake, and NPI use as the empirical network. When either increasing or decreasing  
 40 the transmission rate, we still use intervals of size 0.001.

41 With low transmission rate, vaccination delay does not significantly impact epidemic size when  
 42 NPIs are used. (Table 6). With a transmission rate of  $\beta = 0.00585$ , the difference becomes larger  
 43 (Table 7). With NPIs, final size changes by under 1 percentage point, but without NPIs, the  
 44 difference is  $\approx 18\%$ , and the difference grows larger the later the vaccine is made available. Finally,  
 45 with a higher transmission rate of  $\beta = 0.00685$  (Table 8), NPIs cause the final size to change  $\approx 10\%$   
 46 across all vaccine delays, whereas without NPI effects, final size changes by  $\approx 41\%$ .

47 Considering the effects of differing vaccine efficacy on epidemic outcomes in the random net-  
 48 works, we see similar results to the case with an empirically based network. With NPIs used in  
 49 the population, epidemic size and vaccine uptake show changes across vaccine efficacies of  $\approx 0.55\%$   
 50 and  $16\%$ , respectively, compared to when NPIs are not included ( $3.4\%$  difference for final size and  
 51 only  $1\%$  difference for vaccine uptake, see Tables 9 and 10). An interesting dynamic occurs in the

Table 6: Epidemic final sizes with delayed vaccine availability (random network).  $\beta = 0.00485$

| Delay | Final Size (with NPIs) $\pm 95\%$ CI | Final Size (without NPIs) $\pm 95\%$ CI |
|-------|--------------------------------------|-----------------------------------------|
| 0     | $0.0608 \pm 0.0047$                  | $0.1543 \pm 0.0044$                     |
| 10    | $0.05964 \pm 0.0047$                 | $0.1527 \pm 0.0049$                     |
| 20    | $0.06297 \pm 0.0047$                 | $0.1525 \pm 0.0054$                     |
| 30    | $0.0602 \pm 0.0049$                  | $0.1500 \pm 0.0063$                     |
| 40    | $0.06353 \pm 0.0045$                 | $0.1545 \pm 0.0052$                     |
| 50    | $0.0602 \pm 0.0046$                  | $0.1523 \pm 0.005$                      |
| 60    | $0.0602 \pm 0.0048$                  | $0.1539 \pm 0.0049$                     |

Table 7: Epidemic final sizes with delayed vaccine availability (random network).  $\beta = 0.00585$

| Delay | Final Size (with NPIs) $\pm 95\%$ CI | Final Size (without NPIs) $\pm 95\%$ CI |
|-------|--------------------------------------|-----------------------------------------|
| 0     | $0.1592 \pm 0.0015$                  | $0.1821 \pm 0.0005972$                  |
| 10    | $0.1591 \pm 0.0016$                  | $0.1818 \pm 0.0005030$                  |
| 20    | $0.1592 \pm 0.0014$                  | $0.1816 \pm 0.00053807$                 |
| 30    | $0.1610 \pm 0.0013$                  | $0.1823 \pm 0.0007169$                  |
| 40    | $0.1602 \pm 0.0017$                  | $0.2074 \pm 0.0062$                     |
| 50    | $0.1609 \pm 0.002$                   | $0.2911 \pm 0.011$                      |
| 60    | $0.1649 \pm 0.0027$                  | $0.3667 \pm 0.012$                      |

Table 8: Epidemic final sizes with delayed vaccine availability (random network).  $\beta = 0.00685$

| Delay | Final Size (with NPIs) $\pm 95\%$ CI | Final Size (without NPIs) $\pm 95\%$ CI |
|-------|--------------------------------------|-----------------------------------------|
| 0     | $0.1779 \pm 0.0005021$               | $0.1927 \pm 0.0009735$                  |
| 10    | $0.1781 \pm 0.0004927$               | $0.1932 \pm 0.001$                      |
| 20    | $0.1776 \pm 0.0004817$               | $0.1933 \pm 0.0009566$                  |
| 30    | $0.1798 \pm 0.0012$                  | $0.2634 \pm 0.0091$                     |
| 40    | $0.2116 \pm 0.0038$                  | $0.4638 \pm 0.011$                      |
| 50    | $0.2524 \pm 0.0042$                  | $0.5780 \pm 0.0063$                     |
| 60    | $0.2739 \pm 0.0033$                  | $0.6100 \pm 0.0042$                     |

52 random network as although final size difference for the range of vaccine efficacy given in tables 9  
 53 and 10 with NPIs is much smaller than when there are no NPIs, vaccine uptake increases much  
 54 more. However, with NPIs, vaccine uptake amongst the population is approximately 20-40% lower  
 55 than with no NPIs, and produces smaller epidemic sizes.

56 For the power law networks, we use a Barabási-Albert algorithm with three initial connected  
 57 nodes to create a contact network for each simulation. The parameters used to obtain the same  
 58 epidemic outcomes as the original baseline scenario are  $\lambda = 1.25$ ,  $\gamma = 0.5$ ,  $\theta = 0.35$ ,  $\beta = 0.075$ , and  
 59 the remaining parameters at baseline values. We note that the transmission rate must be higher with  
 60 this network structure to achieve the same epidemic final size, and in turn the same vaccine uptake,

Table 9: Epidemic final sizes corresponding to vaccine efficacy (random network).

| Efficacy | Final Size (With NPIs) $\pm 95\%$ CI | Final Size (Without NPIs) $\pm 95\%$ CI |
|----------|--------------------------------------|-----------------------------------------|
| 0.5      | $0.1644 \pm 0.001$                   | $0.2158 \pm 0.0009870$                  |
| 0.6      | $0.1616 \pm 0.0014$                  | $0.2059 \pm 0.0007589$                  |
| 0.7      | $0.1617 \pm 0.0011$                  | $0.1978 \pm 0.0006078$                  |
| 0.8      | $0.1609 \pm 0.001$                   | $0.1904 \pm 0.0005643$                  |
| 0.9      | $0.1603 \pm 0.001$                   | $0.1858 \pm 0.0004162$                  |
| 1.0      | $0.1589 \pm 0.001$                   | $0.1821 \pm 0.0004704$                  |

Table 10: Population vaccine uptake corresponding to vaccine efficacy (random network).

| Efficacy | Vaccine Uptake (With NPIs) $\pm 95\%$ CI | Vaccine Uptake (Without NPIs) $\pm 95\%$ CI |
|----------|------------------------------------------|---------------------------------------------|
| 0.5      | $0.5940 \pm 0.039$                       | $0.8176 \pm 0.0003564$                      |
| 0.6      | $0.5505 \pm 0.041$                       | $0.8159 \pm 0.0003212$                      |
| 0.7      | $0.5286 \pm 0.042$                       | $0.8137 \pm 0.0003098$                      |
| 0.8      | $0.4762 \pm 0.042$                       | $0.8112 \pm 0.0002534$                      |
| 0.9      | $0.4546 \pm 0.042$                       | $0.8089 \pm 0.0002167$                      |
| 1.0      | $0.4323 \pm 0.043$                       | $0.8067 \pm 0.0002177$                      |

61 and NPI use as the empirical network. When either increasing or decreasing the transmission rate,  
 62 we will use intervals of size 0.02.

63 With a transmission rate of 0.0055, vaccination delay impacts epidemic size by  $\approx 4\%$  when NPIs  
 64 are used and  $\approx 11$  when they are not (Table 11). With a transmission rate of  $\beta = 0.075$ , the  
 65 difference becomes larger (Table 12). With NPIs, final size changes by about 9 percentage points,  
 66 but without NPIs, the difference is  $\approx 23\%$ . For both cases, the difference grows larger in the early  
 67 stages of the epidemic. Finally, with a higher transmission rate of  $\beta = 0.0095$  (Table 13), NPIs  
 68 cause the final size to change  $\approx 15\%$  across all vaccine delays, whereas without NPI effects, final  
 69 size changes by  $\approx 31\%$ . Again, NPIs reduce epidemic sizes, as well as decrease the change in final  
 70 size induced by delays in vaccine availability. In the scale free networks we created, the majority of  
 71 epidemic incidence increase occurs before the 30 day mark of vaccination absence.

Table 11: Epidemic final sizes with delayed vaccine availability (power law network).  $\beta = 0.055$

| Delay | Final Size (with NPIs) $\pm 95\%$ CI | Final Size (without NPIs) $\pm 95\%$ CI |
|-------|--------------------------------------|-----------------------------------------|
| 0     | $0.1231 \pm 0.0014$                  | $0.1736 \pm 0.000806$                   |
| 10    | $0.1282 \pm 0.0028$                  | $0.1805 \pm 0.0012$                     |
| 20    | $0.1411 \pm 0.0033$                  | $0.2242 \pm 0.0038$                     |
| 30    | $0.1623 \pm 0.0017$                  | $0.2644 \pm 0.0043$                     |
| 40    | $0.1607 \pm 0.0021$                  | $0.2822 \pm 0.006$                      |
| 50    | $0.1628 \pm 0.0018$                  | $0.2869 \pm 0.0027$                     |
| 60    | $0.1638 \pm 0.002$                   | $0.2875 \pm 0.0028$                     |

Table 12: Epidemic final sizes with delayed vaccine availability (power law network).  $\beta = 0.075$

| Delay | Final Size (with NPIs) $\pm 95\%$ CI | Final Size (without NPIs) $\pm 95\%$ CI |
|-------|--------------------------------------|-----------------------------------------|
| 0     | $0.1685 \pm 0.0008614$               | $0.2053 \pm 0.0013$                     |
| 10    | $0.1755 \pm 0.0011$                  | $0.2253 \pm 0.0023$                     |
| 20    | $0.2318 \pm 0.0029$                  | $0.3602 \pm 0.0057$                     |
| 30    | $0.2520 \pm 0.002$                   | $0.4276 \pm 0.0028$                     |
| 40    | $0.2565 \pm 0.002$                   | $0.4306 \pm 0.0024$                     |
| 50    | $0.2576 \pm 0.002$                   | $0.4344 \pm 0.0029$                     |
| 60    | $0.2599 \pm 0.0021$                  | $0.4330 \pm 0.0023$                     |

Table 13: Epidemic final sizes with delayed vaccine availability (power law network).  $\beta = 0.095$

| Delay | Final Size (with NPIs) $\pm 95\%$ CI | Final Size (without NPIs) $\pm 95\%$ CI |
|-------|--------------------------------------|-----------------------------------------|
| 0     | $0.1921 \pm 0.0011$                  | $0.2316 \pm 0.0023$                     |
| 10    | $0.2124 \pm 0.0023$                  | $0.2823 \pm 0.0057$                     |
| 20    | $0.3136 \pm 0.0031$                  | $0.4975 \pm 0.0044$                     |
| 30    | $0.3346 \pm 0.0025$                  | $0.5418 \pm 0.0026$                     |
| 40    | $0.3427 \pm 0.0022$                  | $0.5502 \pm 0.0026$                     |
| 50    | $0.3401 \pm 0.0021$                  | $0.5444 \pm 0.0024$                     |
| 60    | $0.3426 \pm 0.002$                   | $0.5442 \pm 0.0026$                     |

72 Considering the effects of differing vaccine efficacy on epidemic outcomes in the power law net-  
 73 works, we see similar results to the case with an empirically based network. With NPIs used in the  
 74 population, epidemic size and vaccine uptake show changes across vaccine efficacies of  $\approx 3.6\%$  and  
 75  $2\%$ , respectively, compared to when NPIs are not included ( $8.8\%$  difference for final size and  $4.4\%$   
 76 difference for vaccine uptake, see Tables 9 and 10).

Table 14: Epidemic final sizes corresponding to vaccine efficacy (power law network).

| Efficacy | Final Size (With NPIs) $\pm 95\%$ CI | Final Size (Without NPIs) $\pm 95\%$ CI |
|----------|--------------------------------------|-----------------------------------------|
| 0.5      | $0.2040 \pm 0.0014$                  | $0.2941 \pm 0.0017$                     |
| 0.6      | $0.1982 \pm 0.0011$                  | $0.2751 \pm 0.0016$                     |
| 0.7      | $0.1922 \pm 0.0011$                  | $0.2557 \pm 0.0014$                     |
| 0.8      | $0.1816 \pm 0.0009980$               | $0.2381 \pm 0.0014$                     |
| 0.9      | $0.1762 \pm 0.0008868$               | $0.2219 \pm 0.0014$                     |
| 1.0      | $0.1682 \pm 0.0007904$               | $0.2060 \pm 0.0013$                     |

77 We have seen with these two alternate types of networks that the main results consistently hold.  
 78 However, each network has unique dynamics that must be taken into account in certain scenarios.  
 79 Thus, assumptions about network structure and transmission are an important consideration par-  
 80 ticularly when modelling a specific disease. For example, a transmission network for influenza likely  
 81 has a different structure than one that would be used to model HIV transmission.

Table 15: Population vaccine uptake corresponding to vaccine efficacy (power law network).

| <b>Efficacy</b> | <b>Vaccine Uptake (With NPIs) <math>\pm 95\%</math> CI</b> | <b>Vaccine Uptake (Without NPIs) <math>\pm 95\%</math> CI</b> |
|-----------------|------------------------------------------------------------|---------------------------------------------------------------|
| 0.5             | $0.4504 \pm 0.003$                                         | $0.5416 \pm 0.0025$                                           |
| 0.6             | $0.4405 \pm 0.0027$                                        | $0.5321 \pm 0.002$                                            |
| 0.7             | $0.4493 \pm 0.0029$                                        | $0.5223 \pm 0.0022$                                           |
| 0.8             | $0.4439 \pm 0.0028$                                        | $0.5213 \pm 0.0022$                                           |
| 0.9             | $0.4303 \pm 0.0025$                                        | $0.4987 \pm 0.0019$                                           |
| 1.0             | $0.4302 \pm 0.0026$                                        | $0.4972 \pm 0.0017$                                           |

### 82 3. Pairwise Analysis

83 We conducted pairwise sensitivity analysis for the behaviour response parameters  $\lambda$  and  $\gamma$  (Figure  
84 2). In total, 81 combinations were used and results of each combination are given as the averages over  
85 500 realizations. We find that increasing  $\lambda$  has the most beneficial effect on decreasing epidemic  
86 final size and increasing vaccination rates. Also, increasing  $\gamma$  alongside  $\lambda$  can complement these  
87 results decreasing incidence or increasing vaccination further. Increasing both of these parameters  
88 can also decrease the NPI use amongst susceptible individuals at the end of an epidemic. This  
89 seems counter intuitive, but since more individuals are vaccinating efficaciously and the amount of  
90 infected individuals becomes smaller, many in the population do not need to practice strong NPI  
91 use. However, increased  $\gamma$  with smaller values of  $\lambda$  can promote NPIs in the population, increasing  
92 the use of these self protective measures when an epidemic is more widespread. Finally, an increase  
93 in  $\lambda$  and  $\gamma$  will shorten the duration the an epidemic, given that far fewer people are becoming  
94 infected.



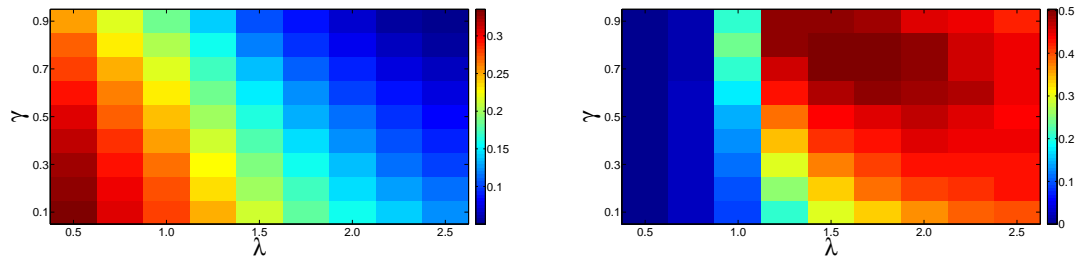

(a)

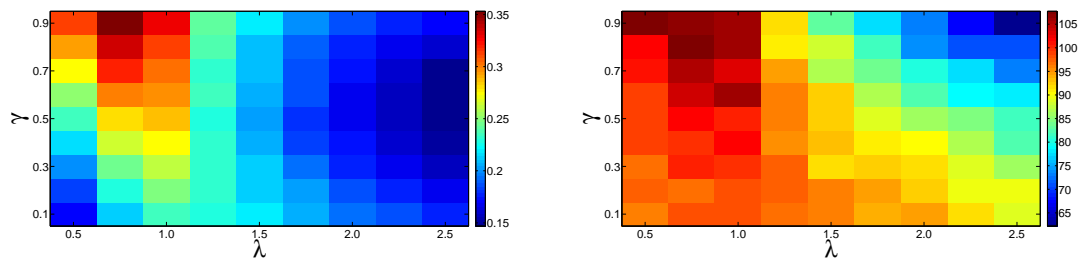

(b)

Figure 2: Pairwise sensitivity analysis of parameters  $\lambda$  and  $\gamma$ . (a) cumulative incidence, (b) cumulative vaccination, (c) transmission rate reduction amongst susceptible population, (d) epidemic length. Results averaged over 500 trials.
